# Supplementary material for: Operational Status of Isolation Rooms in Emergency Departments and Patient Concentration in Higher-Level Emergency Departments in Daegu Metropolitan City and Neighboring Provinces, South Korea, during the COVID-19 Pandemic
Source: MDPI journal article supplement (doi:10.3390/ijerph20043113), 2023-02-10
Supplement: s1 [file s1]

**Table S1.** Disease categories of severe illness code

| No. | Disease category                         | KCD-8 disease code                                                                                                                                                                                                                                                                                                                                                                                                                              |
|-----|------------------------------------------|-------------------------------------------------------------------------------------------------------------------------------------------------------------------------------------------------------------------------------------------------------------------------------------------------------------------------------------------------------------------------------------------------------------------------------------------------|
| 1   | Acute myocardial infarction              | I210-I219                                                                                                                                                                                                                                                                                                                                                                                                                                       |
| 2   | Acute stroke                             | I6300-I64                                                                                                                                                                                                                                                                                                                                                                                                                                       |
| 3   | Intracranial hemorrhage                  | I610-I629                                                                                                                                                                                                                                                                                                                                                                                                                                       |
| 4   | Subarachnoid hemorrhage                  | I600-I609                                                                                                                                                                                                                                                                                                                                                                                                                                       |
| 5   | Major trauma                             | S0610-S0611, S0650-S0651, S0660-S0661, S0670-S0671, S0680-S0681, S0200, S0201, S0210, S0211, S0620, S0621, S0690, S0691, S0640-S0641, S150, S250, S2600, 2601, S2680, S2681, S2690, S2691, S2710, S2711, S2720, S2721, S280, S2730, S2731, S32820-S32891, S351, S352, S353, S354, S355, S357, S359, S36100-S36112, S3670, S3671, S3680, S3681, S3770-S3771, S396, S3640, S3641, S3650, S3651, T0250-T0251, T790-T791, T71, T751<br>ICISS ≤ 0.90 |
| 6   | Aortic dissection                        | I7101-I7109, I7110-I7119, I713, I715, I718                                                                                                                                                                                                                                                                                                                                                                                                      |
| 7   | Hepatobiliary diseases                   | K8000-K8011, K8030-K8041, K8051, K810, K819, K830, K831                                                                                                                                                                                                                                                                                                                                                                                         |
| 8   | Surgical diseases                        | K352-K353, K631, K650-K659, K661                                                                                                                                                                                                                                                                                                                                                                                                                |
| 9   | Gastrointestinal bleeding/foreign bodies | I8500-I8501, I864, I983, K920-K922, K226, K2500, K2540, K2501, K2521, K2541, K2561, K260, K262, K264, K266, T181                                                                                                                                                                                                                                                                                                                                |
| 10  | Tracheobronchial bleeding/foreign bodies | R042, R048, R049, T1740-T1799                                                                                                                                                                                                                                                                                                                                                                                                                   |
| 11  | Intoxication (including CO poisoning)    | T360-T659                                                                                                                                                                                                                                                                                                                                                                                                                                       |
| 12  | Peripartum diseases                      | O000-O009, O140-O159, O4200, O4201, O4209, O4210, O4211, O4219, O4220, O4221, O4229, O4290, O4291, O4299, O450-O459, O6000-O6039, O800-O809, O820-O829, O720-O723, O622                                                                                                                                                                                                                                                                         |
| 13  | Preterm/low birth weight                 | P0700-P0739, P220-P229, P240-P249, P360-P369, P520-P529, P590-P599                                                                                                                                                                                                                                                                                                                                                                              |
| 14  | Major burn                               | T3130-T3199, T2030-T2039, T2070-T2079, T213, T217                                                                                                                                                                                                                                                                                                                                                                                               |
| 15  | Status epilepticus                       | G410-G419                                                                                                                                                                                                                                                                                                                                                                                                                                       |
| 16  | Severe infection                         | A830-A879, G000-G07, A227, A241, A267, A400-A409, A410-A414, A419, A427, B007, B377                                                                                                                                                                                                                                                                                                                                                             |
| 17  | Diabetic coma                            | E1000-E1018, E1100-E1118, E1300-E1318, E1400-E1418                                                                                                                                                                                                                                                                                                                                                                                              |
| 18  | PTE/DVT                                  | I260, I269, I802                                                                                                                                                                                                                                                                                                                                                                                                                                |
| 19  | Arrhythmia                               | I441, I442, I450-I459, I472, I480-I489, I490, I495, I498, I499                                                                                                                                                                                                                                                                                                                                                                                  |
| 20  | ARDS/pulmonary edema                     | J80, J81, J850-J869, J9600-J9699                                                                                                                                                                                                                                                                                                                                                                                                                |
| 21  | DIC                                      | D65                                                                                                                                                                                                                                                                                                                                                                                                                                             |
| 22  | Intussusception/intestinal obstruction   | K561-K563, K565-K566                                                                                                                                                                                                                                                                                                                                                                                                                            |
| 23  | Amputation                               | S480-S489, S580-S589, S6800-S689, S780-S789, S880-S889, S980-S984, T050-T059, T060-T068, T116, T136                                                                                                                                                                                                                                                                                                                                             |
| 24  | Acute kidney injury                      | N170-N179, E1128                                                                                                                                                                                                                                                                                                                                                                                                                                |
| 25  | Ophthalmic emergencies                   | H3300-H3309, H3310-H332, H3330-H334, H3350-H3358, H340-H349, H400, H4010-H4019, H4020-H403, H404, H405, H406, H4080-H409, H420, H428                                                                                                                                                                                                                                                                                                            |
| 26  | Post resuscitation status                | I460-I469                                                                                                                                                                                                                                                                                                                                                                                                                                       |
| 27  | Urological emergencies                   | N44, N4500-N4502, N4590-N4592                                                                                                                                                                                                                                                                                                                                                                                                                   |
| 28  | Shock                                    | T794, T886, T780, T805, T782, R570, R571, R572                                                                                                                                                                                                                                                                                                                                                                                                  |

KCD, Korean Standard Classification of Diseases; CO, carbon monoxide; PTE, pulmonary thromboembolism; DVT, deep vein thrombosis; ARDS, acute respiratory distress syndrome; DIC, disseminated intravascular coagulopathy.
